# Supplementary material
Source: Springer Nature journal article supplement (https://www.springermedizin.de/resource/supplementary/12891_2011_1300_MOESM2_ESM.pdf/9507568)
Supplement: MOESM2 [file 9507568]

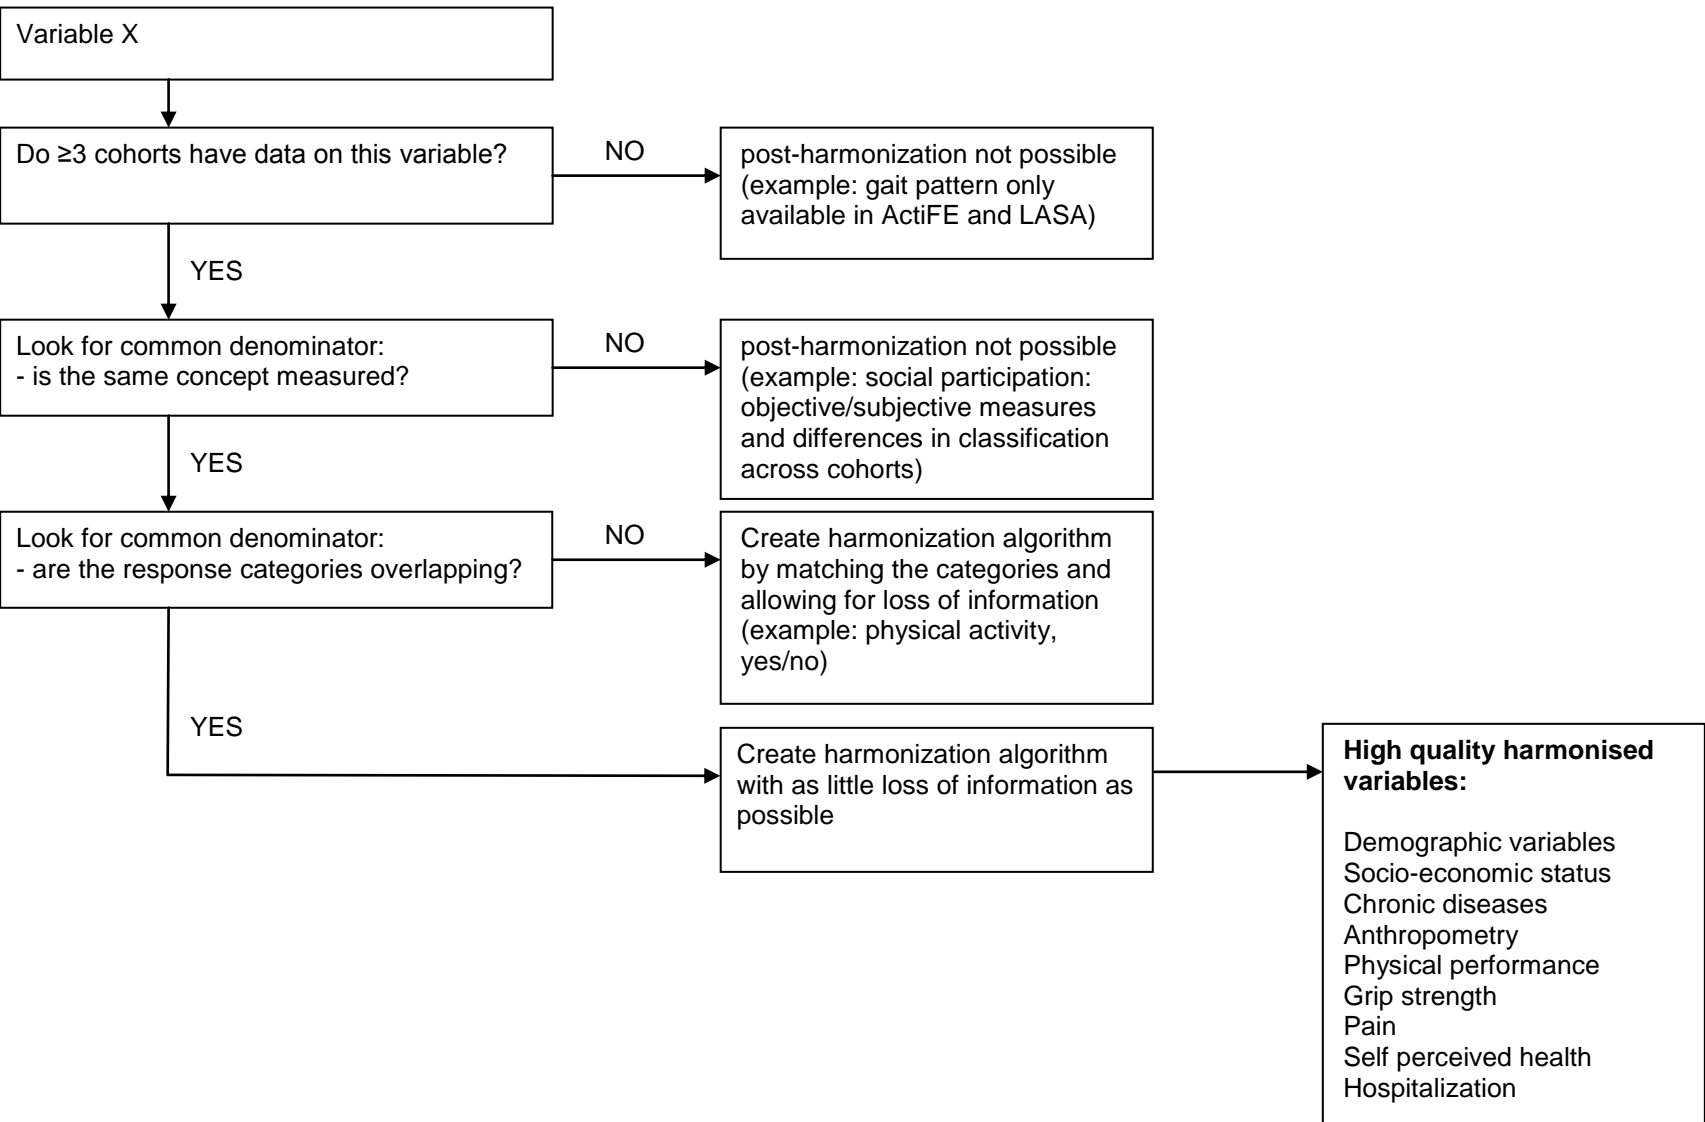

Variable X

Do  $\geq 3$  cohorts have data on this variable?

NO

post-harmonization not possible  
(example: gait pattern only available in ActiFE and LASA)

YES

Look for common denominator:  
- is the same concept measured?

NO

post-harmonization not possible  
(example: social participation:  
objective/subjective measures and differences in classification across cohorts)

YES

Look for common denominator:  
- are the response categories overlapping?

NO

Create harmonization algorithm by matching the categories and allowing for loss of information  
(example: physical activity, yes/no)

YES

Create harmonization algorithm with as little loss of information as possible

**High quality harmonised variables:**  
Demographic variables  
Socio-economic status  
Chronic diseases  
Anthropometry  
Physical performance  
Grip strength  
Pain  
Self perceived health  
Hospitalization
